# Supplementary material for: Affection of Respiratory Muscles in ALS and SMA
Source: MDPI journal article supplement (doi:10.3390/jcm11051163), 2022-02-22
Supplement: s1 [file s1]

**Suppl. Table S1.** Differences of diaphragm ultrasound imaging between the ALS and SMA subcohorts.

| Parameter                                  | Outcome             | ALS (n=40)  | SMA (n=23)  | P-value <sup>§</sup> | Multiple logistic regression analysis <sup>#</sup> |         |
|--------------------------------------------|---------------------|-------------|-------------|----------------------|----------------------------------------------------|---------|
|                                            |                     |             |             |                      | Adjusted correlation coefficient (95%CI)           | P-value |
| <b>Diaphragm thickness insp. right</b>     | Path. (<2mm) [n/%]  | 7/40 (18%)  | 2/23 (9%)   | .467                 | .647<br>(0.040-10.362)                             | .758    |
| <b>Diaphragm thickness insp. left</b>      | Path. (<2mm) [n/%]  | 3/40 (8%)   | 1/22 (5%)   | 1.000                | 8.107<br>(0.088-744.034)                           | .364    |
| <b>Diaphragm thickening ratio right</b>    | Path. (≤1.5) [n/%]  | 36/40 (90%) | 18/23 (78%) | .267                 | 1.898<br>(0.125-28.771)                            | .644    |
| <b>Diaphragm thickening ratio left</b>     | Path. (≤1.5) [n/%]  | 36/40 (90%) | 17/22 (77%) | .259                 | 16.488<br>(0.844-322.181)                          | .065    |
| <b>Diaphragm thickening fraction right</b> | Path. (<20%) [n/%]  | 25/40 (63%) | 6/23 (26%)  | <b>.008</b>          | 3.986<br>(0.579-27.447)                            | .160    |
| <b>Diaphragm thickening fraction left</b>  | Path. (<20%) [n/%]  | 19/40 (48%) | 5/22 (23%)  | .064                 | 3.352<br>(0.453-24.810)                            | .236    |
| <b>Diaphragm excursion right</b>           | Path. (<10mm) [n/%] | 25/40 (63%) | 7/23 (30%)  | <b>.019</b>          | 4.481<br>(0.659-30.449)                            | .125    |
| <b>Diaphragm excursion left</b>            | Path. (<10mm) [n/%] | 19/39 (54%) | 7/22 (32%)  | .282                 | 2.656<br>(0.399-17.681)                            | .312    |

Depicted are number of patients with normal and pathological findings in ultrasound diaphragm measures in regard to normative values according to [1–5]. <sup>§</sup> *p* values are from Fisher's exact test. <sup>#</sup> Binary logistic regression analyses were performed to adjust for the candidate covariates sex, age and BMI. The reported regression coefficients (ExpB with 95% confidence interval) >0 indicates the magnitude of influence of disease entity on diaphragm parameters after adjusting for candidate covariates sex, age and BMI and standardization. ALS, Amyotrophic lateral sclerosis; SMA, spinal muscular atrophy; BMI, Body mass index.

## References

- Cardenas, L.Z.; Santana, P.V.; Caruso, P.; Ribeiro de Carvalho, C.R.; Pereira de Albuquerque, A.L. Diaphragmatic Ultrasound Correlates with Inspiratory Muscle Strength and Pulmonary Function in Healthy Subjects. *Ultrasound Med Biol* **2018**, *44*, 786-793, doi:10.1016/j.ultrasmedbio.2017.11.020.
- Summerhill, E.M.; El-Sameed, Y.A.; Glidden, T.J.; McCool, F.D. Monitoring recovery from diaphragm paralysis with ultrasound. *Chest* **2008**, *133*, 737-743, doi:10.1378/chest.07-2200.
- Kabitz, H.J.; Walterspacher, S.; Mellies, U.; Crie, C.P.; Windisch, W. [Recommendations for respiratory muscle testing]. *Pneumologie* **2014**, *68*, 307-314, doi:10.1055/s-0034-1365283.
- Spiesshoefer, J.; Herkenrath, S.; Henke, C.; Langenbruch, L.; Schneppe, M.; Randerath, W.; Young, P.; Brix, T.; Boentert, M. Evaluation of Respiratory Muscle Strength and Diaphragm Ultrasound: Normative Values, Theoretical Considerations, and Practical Recommendations. *Respiration* **2020**, *99*, 369-381, doi:10.1159/000506016.
- Windisch, W.; Schonhofer, B.; Magnet, F.S.; Stoelben, E.; Kabitz, H.J. [Diagnosis and Treatment of Diaphragmatic Dysfunction]. *Pneumologie* **2016**, *70*, 454-461, doi:10.1055/s-0042-106694.
