# Supplementary figures and images for: Affection of Respiratory Muscles in ALS and SMA
Source: MDPI journal article supplement (doi:10.3390/jcm11051163), 2022-02-22

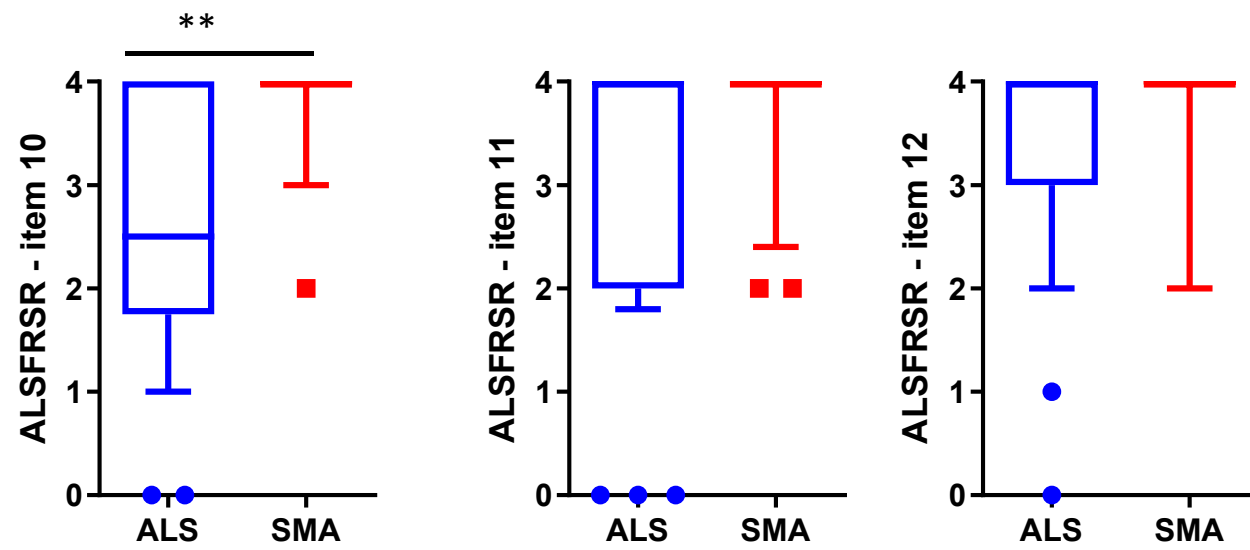

**Figure S1.** Individual items of ALSFRSR respiratory subscores are shown. \*\*  $p$  values  $< 0.01$ .

Supplement: s1 [file s1]
